# Supplementary material
Source: MDPI journal article supplement (https://www.mdpi.com/2075-5309/9/10/219)
Supplement: s1 [file s1]

## Appendix

The 22 glare/luminance/Illuminance indices extracted from Evalglare [1] are detailed in the following table;

| Index         | Description                                                                                                                                            |
|---------------|--------------------------------------------------------------------------------------------------------------------------------------------------------|
| DGP           | <b>Daylight Glare Probability</b> is a glare metric developed based on an empirical approach [2]                                                       |
| Av_lum        | <b>Average Luminance of Image</b>                                                                                                                      |
| E_v           | <b>Vertical Illuminance</b>                                                                                                                            |
| DGI           | <b>Daylight Glare Index</b> predict discomfort glare from large sources (i.e., visible sky from the window). [3]                                       |
| UGR           | <b>Unified Glare Rating</b> is developed by CIE and is restricted to a specific small glare source sizes within the upper part of the visual field [4] |
| VCP           | <b>Visual Comfort Probability</b> [5]                                                                                                                  |
| CGI           | <b>CIE Glare Index</b> Einhorn [6]                                                                                                                     |
| Lum_sources   | <b>Average Luminance of All Glare Sources</b>                                                                                                          |
| Omega_sources | <b>Sum of Solid Angles of Glare Sources</b>                                                                                                            |
| Lum_backg     | <b>Background Luminance</b>                                                                                                                            |
| E_v_dir       | <b>Direct Vertical Illuminance</b>                                                                                                                     |
| Lveil         | <b>Veiling Luminance</b> (disability glare according Poynter)                                                                                          |
| Lveil_cie     | <b>Veiling Luminance</b> (sum of disability glare according Stiles-Holladay CIE)                                                                       |
| DGR           | <b>Discomfort Glare Ratio</b>                                                                                                                          |
| UGP           | <b>Unified Glare Probability</b> is a modified version of the Unified Glare Rating (UGR) [7]                                                           |
| UGR_exp       | <b>Unified Glare Rating</b>                                                                                                                            |
| DGI_mod       | <b>Daylight Glare Index</b> Nazzal and Chutarat [8]                                                                                                    |
| Av_lum_pos    | <b>Average luminance weighted by position index</b>                                                                                                    |
| Av_lum_pos2   | <b>Average luminance weighted by squared position index</b>                                                                                            |
| Med_lum       | <b>Median luminance of image</b>                                                                                                                       |
| Med_lum_pos   | <b>Median of position index weighted luminance of image</b>                                                                                            |
| Med_lum_pos2  | <b>Median of squared position index weighted luminance of image</b>                                                                                    |

1. Wienold, J., C. REETZ, and T. KUHN. *Evalglare: a new RADIANCE-based tool to evaluate glare in office spaces*. in *3rd International Radiance Workshop*. 2004.
2. Wienold, J. and J. Christoffersen, *Evaluation methods and development of a new glare prediction model for daylight environments with the use of CCD cameras*. Energy and Buildings, 2006. **38**(7): p. 743-757.
3. Hopkinson, R.G., *Glare from daylighting in buildings*. Applied Ergonomics, 1972. **3**(4): p. 206-215.
4. Carlucci, S., F. Causone, F. De Rosa, and L. Pagliano, *A review of indices for assessing visual comfort with a view to their use in optimization processes to support building integrated design*. Renewable and Sustainable Energy Reviews, 2015. **47**: p. 1016-1033.
5. Luckiesh, M. and S.K. Guth, *Brightnesses in Visual Field at Borderline Between Comfort and Discomfort (BCD)*. LEUKOS, 1949.
6. Einhorn, H.D., *Discomfort glare: a formula to bridge differences*. Lighting Research and Technology, 1979. **11**(2): p. 90-94.
7. Hirning, M.B., G.L. Isoardi, and I. Cowling, *Discomfort glare in open plan green buildings*. Energy and Buildings, 2014. **70**: p. 427-440.
8. Nazzal, A.A. and A. Chutarat, *A New Daylight Glare Evaluation Method*. Architectural Science Review, 2001. **44**(1): p. 71-82.
